# Supplementary material
Source: HighWire-hosted journal article supplement (https://www.cmaj.ca/highwire/filestream/148899/field_highwire_adjunct_files/0/221512-res-1-at.pdf)
Supplement: 221512-res-1-at.pdf [file 221512-res-1-at.pdf]

***Supplementary Figure 1: Schematic illustration of the interrupted time series analysis model for this study***

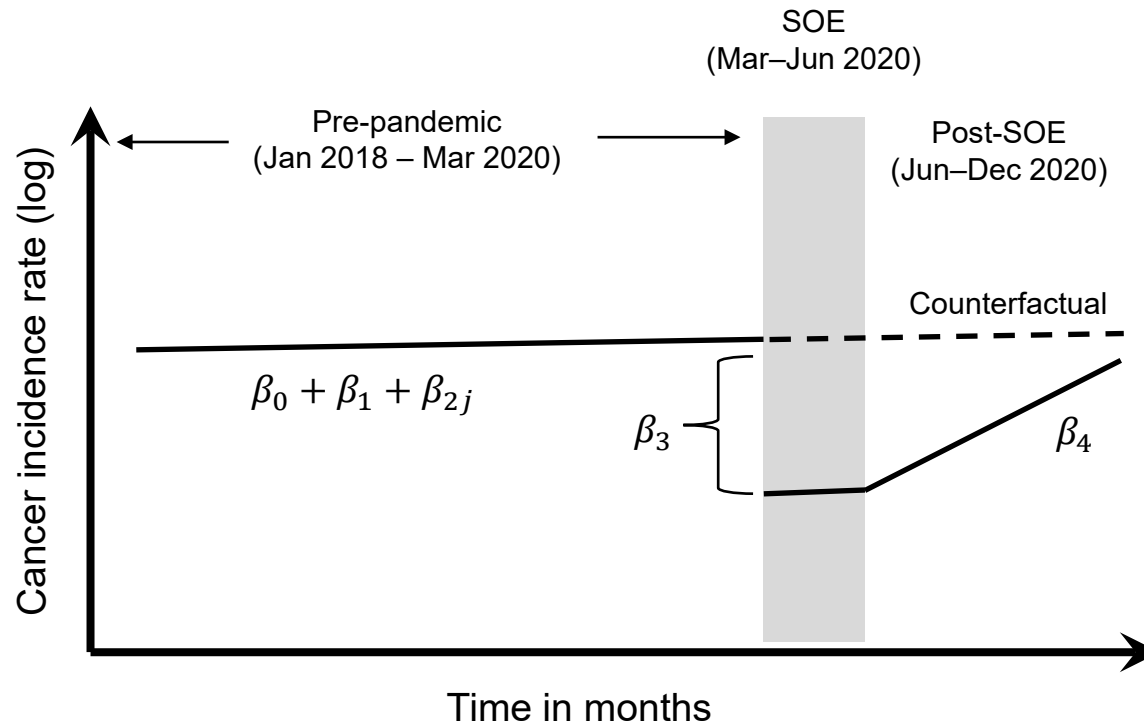

$$\log\left(\frac{\text{Cancer diagnoses}_t}{\text{Population}_t}\right) = \beta_0 + \beta_1 \text{Time} + \beta_{2j} \text{Month}_{tj} + \beta_3 \text{SOE}_t + \beta_4 \text{PostSOE}_t$$
